# Supplementary material
Source: PubMed Central journal article supplement (PMC2658606)

## Supplemental Material

S1.

The following section contains the sequences of proteins identified from AD and MCI hippocampus and IPL. The primary sequences were obtained from the NCBI database with sequences in **bold red** representing portions of the protein that correspond to tryptic peptides obtained from spots isolated from 2D gels, digested with trypsin, and subjected to MALDI-TOF mass spectrometry. Mass peak values for the peaks are listed below the NCBI sequence with **red mass values** representing peptides that were matched to the primary sequence. The amino acid sequences with any oxidative modifications that correspond to **red-labeled** MS peaks and MOWSE score probability graphs are also included for each protein.

Match to: **S68209** Score: **68** Expect: **0.023**  
**sds22 protein homolog – human**

Fixed modifications: Carbamidomethyl (C)

Variable modifications: Oxidation (M)

Cleavage by Trypsin: cuts C-term side of KR unless next residue is P

Number of mass values searched: **23**

Number of mass values matched: **7**

Sequence Coverage: **26%**

Mached peptides shown in **Bold Red** in the primary sequence obtained from the NCBI database

**1 MAAERGAGQQ QSQEMMEVDR** RVESEESGDE EGKKHSSGIVADLSEQSLKD  
**51** GEERGEEDPE EEHELPVDME TINLDRDAED VDLNHYRIGK IEGFEVLKKV  
**101** KTLCLRQNLK CIENLEELQ SLRELDLYDN QIKKIENLEA LTELEILDIS  
**151** FNLLRNIEGV DKLTRLKCLF LVNNKISKIE NLSNLHQLQM LELGSNRIRA  
**201 IENIDTLTNL ESLFLGKNKI TKLQNLDAIT NLTVLMSQSNRLTKIEGLQN**  
**251 LVNLRELYLS HNGIEVIEGL ENNNKLTMLD IASNRICKIE NISHLTELQE**  
**301** FWMNDNLLES WSDLDELKGA **RSLETVYLER** NPLQKDPQYR RKMVLMALPSV  
**351 RQIDATFVRF**

MS peak list

817.1189, 823.1467, 839.0977, 861.1074, 864.5075, 892.5376, 899.5597, **949.4992**, 1022.3511  
1028.1499, 1034.1422, 1050.1290, 1102.5670, **1109.5869**, **1149.5951**, 1239.1344, **1268.7734**  
1277.1644, 1306.8617, 1738.6869, **2147.1362**, **2233.1077**, **2268.1123**

| Start - End | Observed  | Mr(expt)  | Mr(calc)  | ppm | Miss Sequence |                         |               |
|-------------|-----------|-----------|-----------|-----|---------------|-------------------------|---------------|
| 1 - 20      | 2268.1123 | 2267.1050 | 2266.9729 | 58  | 1             | -.MAAERGAGQQSQEMMEVDR.R | Oxidation (M) |
| 200 - 219   | 2233.1077 | 2232.1004 | 2232.2001 | -45 | 1             | R.AIENIDTLTNLESFLGKNK.I |               |
| 223 - 241   | 2147.1362 | 2146.1289 | 2146.1052 | 11  | 0             | K.LQNLDALTNLTVLSMQSNR.L | Oxidation (M) |
| 245 - 255   | 1268.7734 | 1267.7661 | 1267.7248 | 33  | 0             | K.IEGLQNLVNL.R.E        |               |
| 276 - 285   | 1149.5951 | 1148.5878 | 1148.5859 | 2   | 0             | K.LTMLDIASNR.I          | Oxidation (M) |
| 322 - 330   | 1109.5869 | 1108.5796 | 1108.5764 | 3   | 0             | R.SLETVYLER.N           |               |
| 352 - 359   | 949.4992  | 948.4919  | 948.5029  | -12 | 0             | R.QIDATFVR.F            |               |

### Probability Based Mowse Score

Protein score is  $-10 \cdot \log(P)$ , where P is the probability that the observed match is a random event. Protein scores greater than 64 are significant ( $p < 0.05$ ).

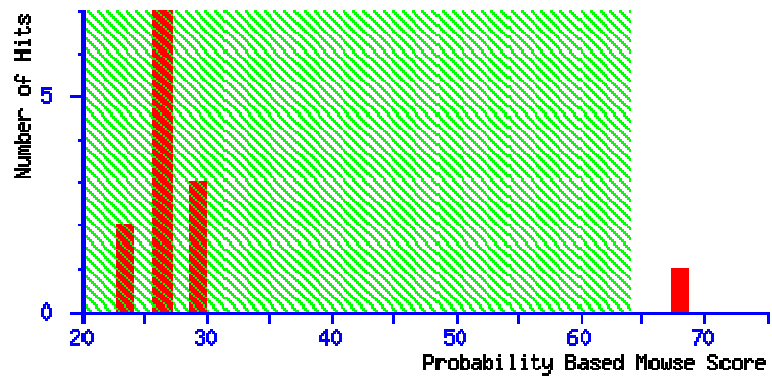

Match to: **JC5317** Score: **99** Expect: **1.9e-05**  
**dihydropyrimidinase-related protein 2 - human**

Fixed modifications: Carbamidomethyl (C)  
Variable modifications: Oxidation (M)  
Cleavage by Trypsin: cuts C-term side of KR unless next residue is P  
Number of mass values searched: **38**  
Number of mass values matched: **12**  
Sequence Coverage: **27%**

Mached peptides shown in **Bold Red** in the primary sequence obtained from the NCBI database

1 MSYQGKKNIP RITSDRLLIK GGK**IVNDDQS FYADIYMEDG LIKQIGENLI**  
51 **VPGGVK**TIEA HSR**MVIPGGI DVHTR**FQMPD QGMTSADDDFF QGTKAALAGG  
101 TTMIIDHVVP EPGTSLAAF DQWREWADSK SCCDYSLHVD ISEWHKGIQE  
151 EMEALVKDHG VNSFLVYMAF KDRFQLTDCQ IYEVLSVIRD **IGAIAQVHAE**  
201 **NGDIAEEQQ R**ILDLGITGP EGHVLSRPEE VEAEAVNRAI TIANQTNCP  
251 YITKVMSK**SS AEVIAQARKK** GTVVYGEPI ASLGTDGSHY WSKNWA  
301 FVTSPPLSPD PTPDFLNSL LSCGDLQVTG SAHCTFNTAQ KAVGKDNFTL  
351 IPEGTNGTEE RMSVIWDKAV VTGK**MDENQF VAVTSTNAAK VFNLYPRKGR**  
401 IAVGSDADLV IWDPDSVKTI SAKTHNSSLE YNIFEGMECR GSPLVVISQ  
451 **KIVLEDGTLH VTEGSGRYIP RKPFPDFVYK** RIKARSRLAE LRGVPRGLYD  
501 GPVCEVSVTP KTVTPASSAK TSPAK**QQAPP VRNLHQSGFS LSGAQIDDNI**  
551 **PRRTTQRIVA PPGGR**ANITS LG

MS peak list

**766.4514, 795.4133, 861.1041, 892.5098, 908.5157, 1006.4257, 1031.5680, 1050.0890, 1106.5304, 1126.5518, 1140.6339**  
1162.6238, 1179.6194, 1232.6132, 1277.7684, **1310.6833, 1323.7286, 1475.7993, 1485.7877, 1497.7633, 1682.9167**  
1697.9100, 1716.8810, **1741.8251, 1793.8562, 1837.9352, 1858.7747, 1922.9568, 1962.8965, 1987.0347, 2044.1069, 2169.0754**  
**2365.0579, 2377.1797, 2399.0532, 2565.2407, 2899.4888, 2949.4438**

| Start - End | Observed  | Mr(expt)  | Mr(calc)  | ppm | Miss Sequence                            |
|-------------|-----------|-----------|-----------|-----|------------------------------------------|
| 24 - 43     | 2365.0579 | 2364.0506 | 2364.0831 | -14 | 0 K.IVNDDQSFYADIYMEDGLIK.Q Oxidation (M) |
| 44 - 56     | 1323.7286 | 1322.7213 | 1322.7558 | -26 | 0 K.QIGENLIVPGGVK.T                      |
| 64 - 75     | 1310.6833 | 1309.6760 | 1309.6813 | -4  | 0 R.MVIPGGIDVHTR.F Oxidation (M)         |
| 190 - 211   | 2377.1797 | 2376.1724 | 2376.1669 | 2   | 0 R.DIGAIAQVHAENGDIIEEQQR.I              |
| 259 - 268   | 1031.5680 | 1030.5607 | 1030.5407 | 19  | 0 K.SSAEVIAQAR.K                         |
| 375 - 390   | 1741.8251 | 1740.8178 | 1740.7989 | 11  | 0 K.MDENQFVAVTSTNAAK.V Oxidation (M)     |
| 391 - 397   | 908.5157  | 907.5084  | 907.4916  | 19  | 0 K.VFNLYPR.K                            |
| 452 - 467   | 1682.9167 | 1681.9094 | 1681.8635 | 27  | 0 K.IVLEDGTLHVTEGSGR.Y                   |
| 472 - 480   | 1140.6339 | 1139.6266 | 1139.6015 | 22  | 0 R.KPFPDFVYK.R                          |
| 526 - 532   | 795.4133  | 794.4060  | 794.4399  | -43 | 0 K.QQAPPVR.N                            |
| 533 - 552   | 2169.0754 | 2168.0681 | 2168.0610 | 3   | 0 R.NLHQSGFSLSGAQIDDNIPR.R               |
| 558 - 565   | 766.4514  | 765.4441  | 765.4497  | -7  | 0 R.IVAPPGGR.A                           |

### Probability Based Mowse Score

Protein score is  $-10 \cdot \log(P)$ , where P is the probability that the observed match is a random event. Protein scores greater than 64 are significant ( $p < 0.05$ ).

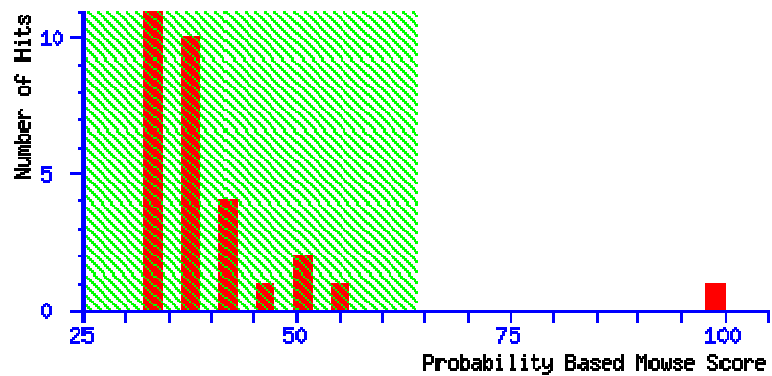

Match to: **JC5317** Score: **166** Expect: **3.7e-12**  
**dihydropyrimidinase-related protein 2 – human**

Fixed modifications: Carbamidomethyl (C)  
Variable modifications: Oxidation (M)  
Cleavage by Trypsin: cuts C-term side of KR unless next residue is P  
Number of mass values searched: **41**  
Number of mass values matched: **17**  
Sequence Coverage: **42%**

Mached peptides shown in **Bold Red** in the primary sequence obtained from the NCBI database

1 MSYQGKKNIP RITSDRLLIK GGK**IVNDDQS FYADIYMEDG LIKQIGENLI**  
51 **VPGGVKTIEA HSRMVIPGGI DVHTRFQMPD QGMSADDF QGTKAALAGG**  
101 TTMIIDHVVP EPGTSLAAF DQWREWADSK SCCDYSLHVD ISEWHK**GIQE**  
151 **EMEALVKDHG VNSFLVYMAF KDRFQLTDCQ IYEVLSVIRD IGAIQVHAE**  
201 NGDIIAEEQQ RILDLGITGP EGHVLSRPEE VEAEAVNRAI TIANQTNCP**L**  
251 **YITKVMSKSS AEVIAQARKK GTVVYGEPI** ASLGTDGSHY WSKNWA**KAAA**  
301 FVTSPPLSPD PTPDFLNSL LSCGDLQVTG SAHCTFN**TAQ** KAVGKDN**FTL**  
351 IPEGTNGTEE RMSVIWDKAV VTGK**MDENQF VAVTSTNAAK VFNLYPRKGR**  
401 **IAVGSDADLV IWDPDSVKTI** SAKTHNSSLE YNIFEGMECR **GSPLVVISQG**  
451 **KIVLEDGTLH VTEGSGRYIP RKPFPDFVYK** RIKARSRLAE LRGVPRGLYD  
501 GPVCEVSVTP **KTVTPASSAK TSPAK**QQAPP VRNLHQSGFS LSGAQIDDNI  
551 PRRTTQRIVA PPGGRANITS LG

MS peak list

813.4457, 839.0950, 861.1203, 864.5158, 877.1197, 892.5545, 908.5491, 930.5136, 1031.6145, 1050.1189, 1072.0892  
1084.6620, 1106.6329, 1140.6595, 1162.6672, 1262.6750, 1277.1160, 1310.7291, 1323.7747, 1332.7139, 1345.8196  
1437.7990, 1485.7562, 1682.9391, 1697.9257, 1704.8601, 1719.8932, 1741.8441, 1763.8064, 1815.8148, 1820.9727  
1836.9156, 1858.9148, 1899.9850, 1931.9634, 2182.8420, 2233.1248, 2255.0718, 2365.0576, 2378.1682, 2900.4065

| Start - End | Observed  | Mr(expt)  | Mr(calc)  | ppm | Miss | Sequence                               |
|-------------|-----------|-----------|-----------|-----|------|----------------------------------------|
| 24 - 43     | 2365.0576 | 2364.0503 | 2364.0831 | -14 | 0    | K.IVNDDQSFYADIYMEDGLIK.Q Oxidation (M) |
| 44 - 56     | 1323.7747 | 1322.7674 | 1322.7558 | 9   | 0    | K.QIGENLIVPGGVK.T                      |

|           |           |           |           |     |   |                                 |                 |
|-----------|-----------|-----------|-----------|-----|---|---------------------------------|-----------------|
| 57 - 63   | 813.4457  | 812.4384  | 812.4140  | 30  | 0 | K.TIEAHSR.M                     |                 |
| 64 - 75   | 1310.7291 | 1309.7218 | 1309.6813 | 31  | 0 | R.MVIPGGIDVHTR.F                | Oxidation (M)   |
| 76 - 94   | 2182.8420 | 2181.8347 | 2181.8984 | -29 | 0 | R.FQMPDQGMTSADDDFFQGTK.A        | 2 Oxidation (M) |
| 147 - 157 | 1262.6750 | 1261.6677 | 1261.6224 | 36  | 0 | K.GIQEEMEALVK.D                 | Oxidation (M)   |
| 172 - 189 | 2255.0718 | 2254.0645 | 2254.1416 | -34 | 1 | K.DRFQLTDCQIYEVLSVIR.D          |                 |
| 212 - 238 | 2900.4065 | 2899.3992 | 2899.5039 | -36 | 0 | R.ILDLGITGPEGHVLSRPEEVEAEAVNR.A |                 |
| 239 - 254 | 1820.9727 | 1819.9654 | 1819.9502 | 8   | 0 | R.AITIANQTNCPYITK.V             |                 |
| 259 - 268 | 1031.6145 | 1030.6072 | 1030.5407 | 65  | 0 | K.SSAEVIAQAR.K                  |                 |
| 375 - 390 | 1741.8441 | 1740.8368 | 1740.7989 | 22  | 0 | K.MDENQFVAVTSTNAAK.V            | Oxidation (M)   |
| 391 - 397 | 908.5491  | 907.5418  | 907.4916  | 55  | 0 | K.VFNLYPR.K                     |                 |
| 401 - 418 | 1899.9850 | 1898.9777 | 1898.9626 | 8   | 0 | R.IAVGSDADLVIWDPDSVK.T          |                 |
| 441 - 451 | 1084.6620 | 1083.6547 | 1083.6288 | 24  | 0 | R.GSPLVVISQGK.I                 |                 |
| 452 - 467 | 1682.9391 | 1681.9318 | 1681.8635 | 41  | 0 | K.IVLEDGTLHVTEGSGR.Y            |                 |
| 472 - 480 | 1140.6595 | 1139.6522 | 1139.6015 | 44  | 0 | R.KPFPDFVYK.R                   |                 |
| 512 - 525 | 1345.8196 | 1344.8123 | 1344.7249 | 65  | 1 | K.TVTPASSAKTSPAK.Q              |                 |

### Probability Based Mowse Score

Protein score is  $-10 \cdot \log(P)$ , where P is the probability that the observed match is a random event. Protein scores greater than 64 are significant ( $p < 0.05$ ).

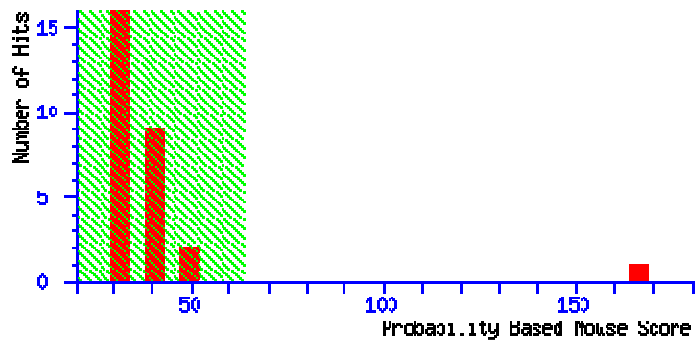

Match to: **A29821** Score: **117** Expect: **3e-07**  
dnaK-type molecular chaperone HSPA5 precursor – human  
Alternate names: BiP; **glucose-regulated 78K protein**; Ig heavy chain-binding protein

Fixed modifications: Carbamidomethyl (C)  
Variable modifications: Oxidation (M)  
Cleavage by Trypsin: cuts C-term side of KR unless next residue is P  
Number of mass values searched: **40**  
Number of mass values matched: **14**  
Sequence Coverage: **25%**

Mached peptides shown in **Bold Red** in the primary sequence obtained from the NCBI database

1 MKLSLVAAML LLLSAARAE EDKKEDVGTV VGIDLGTTYS CVGVFKNGRV  
51 **EIANDQGNR ITPSYVAFTP EGERLIGDAA** KNQLTSNPEN TVFDAKRLIG  
101 RTWNDPSVQQ DIKFLPFKVV EKKTKPYIQV DIGGGQTK**TF APEEISAMVL**  
151 **TKMKETA**EAY LGKK**VTHAVV TVPAYFNDAQ** RQATKDAGTI AGLNVMRIIN  
201 EPTAAAIAYG LDKREGEKNI LVFDLGGGTF DVSLLTIDNG VFEVVATNGD  
251 THLGGEDFDQ RVMEHFILY KKKTGKDVRK DNRAVQKLRR EVEKAK**ALSS**  
301 **QHQARIEIES FYEGEDFSET LTRAKFEELN MDLFR**STMKP VQKVLEDSDL  
351 **KKSDIDEIVL VGGSTR**IPKI QQLVKEFFNG KEPSRGINPD EAVAYGAAVQ  
401 AGVLSGDQDT GDLVLLHVCP LTLGIETVGG VMTKLIPSNT VVPTKNSQIF  
451 STASDNQPTV TIK**VYEGERP LTKDNHLLGT FDLTGIPPAP RGVPQIEVTF**  
501 **EIDVNGILRV** TAEDKGTGNK NKITITNDQN RLTPEEIERM VNDAEKFAEE  
551 DKKLKERIDT RNELESYAYS LKNQIGDKEK LGGKLSSDK ETMEKAVEEK  
601 IEWLESHQDA DIEDFKAKKK ELEEIVQPII SKLYGSAGPP PTGEEDTAEK  
651 DEL

MS peak list

839.1116, 892.5648, 906.8632, 915.9758, 934.8785, 984.1492, 986.6072, **997.5682**, 1019.5576, 1028.1166, 1034.1561  
1050.1412, 1072.1046, **1191.7159**, 1213.7026, **1228.7181**, **1233.6962**, 1239.1453, 1250.6979, 1261.1561, 1277.1711, 1283.1226,  
**1329.6718**, 1419.8920, **1460.8563**, **1528.7994**, **1552.7867**, **1566.8448**, **1588.9209**, 1699.9161, 1709.9169, 1858.9907, **1888.0431**  
1909.9604, **1934.0532**, 1956.0643, **1999.1542**, **2165.0608**, 2187.0073, 2233.1418

| Start - End | Observed  | Mr(expt)  | Mr(calc)  | ppm | Miss Sequence                      |
|-------------|-----------|-----------|-----------|-----|------------------------------------|
| 50 - 60     | 1228.7181 | 1227.7108 | 1227.6207 | 73  | 0 R.VEIIANDQGNR.I                  |
| 61 - 74     | 1566.8448 | 1565.8375 | 1565.7726 | 41  | 0 R.ITPSYVAFTPEGER.L               |
| 139 - 152   | 1552.7867 | 1551.7794 | 1551.7854 | -4  | 0 K.TFAPEEISAMVLTK.M Oxidation (M) |
| 165 - 181   | 1888.0431 | 1887.0358 | 1886.9639 | 38  | 0 K.VTHAVVTVPAYFNDAQR.Q            |
| 186 - 197   | 1233.6962 | 1232.6889 | 1232.6183 | 57  | 0 K.DAGTIAGLNVMR.I Oxidation (M)   |
| 297 - 305   | 997.5682  | 996.5609  | 996.5101  | 51  | 0 K.ALSSQHQR.I                     |
| 306 - 323   | 2165.0608 | 2164.0535 | 2163.9848 | 32  | 0 R.IEIESFYEGEDFSETLTR.A           |
| 324 - 335   | 1528.7994 | 1527.7921 | 1527.7391 | 35  | 1 R.AKFEELNMDLFR.S Oxidation (M)   |
| 326 - 335   | 1329.6718 | 1328.6645 | 1328.6071 | 43  | 0 K.FEELNMDLFR.S Oxidation (M)     |
| 352 - 366   | 1588.9209 | 1587.9136 | 1587.8468 | 42  | 1 K.KSDIDEIVLVGGSTR.I              |
| 353 - 366   | 1460.8563 | 1459.8490 | 1459.7518 | 67  | 0 K.SDIDEIVLVGGSTR.I               |
| 464 - 473   | 1191.7159 | 1190.7086 | 1190.6295 | 66  | 0 K.VYEGERPLTK.D                   |
| 474 - 491   | 1934.0532 | 1933.0459 | 1933.0058 | 21  | 0 K.DNHLLGTFDLTGIPPAPR.G           |
| 492 - 509   | 1999.1542 | 1998.1469 | 1998.0786 | 34  | 0 R.GVPQIEVTFEIDVNGILR.V           |

### Probability Based Mowse Score

Protein score is  $-10 \cdot \log(P)$ , where P is the probability that the observed match is a random event. Protein scores greater than 64 are significant ( $p < 0.05$ ).

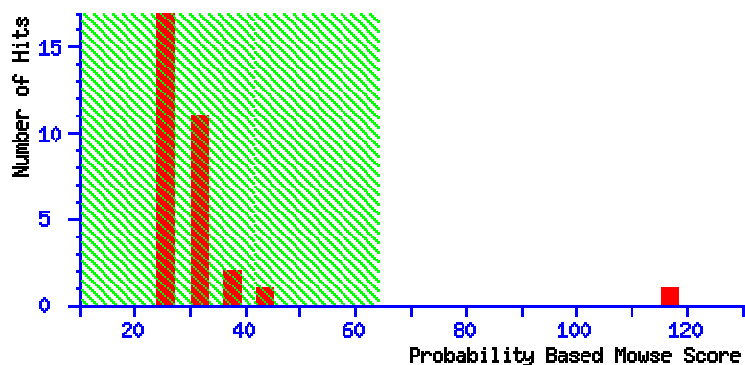



Match to: **A32936** Score: **187** Expect: **3e-14**  
**glial fibrillary acidic protein – human**

Fixed modifications: Carbamidomethyl (C)  
Variable modifications: Oxidation (M)  
Cleavage by Trypsin: cuts C-term side of KR unless next residue is P  
Number of mass values searched: **42**  
Number of mass values matched: **20**  
Sequence Coverage: **39%**

Mached peptides shown in **Bold Red** in the primary sequence obtained from the NCBI database

1 MERRRITSAA RRSYVSSGEM MVGGLAPGRR LGPGTRLSLA RMPPPLPTRV  
51 DFSLAGALNA GFKETRASER **AEMMELNDRF ASYIEK**VRFL EQQN**KALAAE**  
101 **LNQLRAKEPT KLADVYQAE**L REL**RLRLDQL TANSAR**LEVE RDN**LAQDLAT**  
151 **VRQKLQDET**N LR**LEAEN**NLA AYRQEADEAT LARLDLER**KI ESLEEE**IRFL  
201 **RKIHEEEVRE LQEQLAR**QQV HVELDVAKPD LTAALKEIRT QYEAMASSNM  
251 HEAEWYRSK **FADLTDAAR** NAELLRQAKH EANDYRRQLQ SLTCDLESLR  
301 GTNESLERQM REQEERHVRE **AASYQEALAR LEEGQSLKD EMARHLQEYQ**  
351 **DLLNVKLALD IEIATYRKL**L EGEENRITIP VQTFSNLQIR ETSLDTKSVS  
401 EGHLKRNIVV KTVEMRDGEV IKESKQEHKD VM

MS peak list

790.4592, 794.0910, 823.1438, 839.1193, 861.1104, 864.5042, 892.5454, 899.5588, **911.4642**, 942.4276, **959.4702**, **986.5663**  
**988.5643**, 1034.1458, **1039.5876**, **1050.5624**, **1087.5906**, **1098.6796**, **1140.5027**, 1160.6162, **1177.6777**, 1199.6578, **1208.6561**  
**1215.6886**, 1235.6555, **1245.7267**, **1263.6997**, **1277.8020**, 1299.7454, 1334.8265, **1357.7761**, 1406.8079, **1499.8199**, 1586.7579  
1620.8143, **1650.7798**, 1805.0222, **1962.9731**, 1971.0034, 2044.9465, 2233.1287, 2268.1206

| Start - End      | Observed         | Mr(expt)         | Mr(calc)         | ppm       | Miss Sequence                               |
|------------------|------------------|------------------|------------------|-----------|---------------------------------------------|
| <b>71 - 79</b>   | <b>1140.5027</b> | <b>1139.4954</b> | <b>1139.4587</b> | <b>32</b> | <b>0 R.AEMMELNDR.F</b> 2 Oxidation (M)      |
| <b>71 - 86</b>   | <b>1962.9731</b> | <b>1961.9658</b> | <b>1961.8862</b> | <b>41</b> | <b>1 R.AEMMELNDRFASYIEK.V</b> Oxidation (M) |
| <b>96 - 105</b>  | <b>1098.6796</b> | <b>1097.6723</b> | <b>1097.6193</b> | <b>48</b> | <b>0 K.ALAAELNQLR.A</b>                     |
| <b>112 - 121</b> | <b>1177.6777</b> | <b>1176.6704</b> | <b>1176.6139</b> | <b>48</b> | <b>0 K.LADVYQAELE.R</b>                     |
| <b>125 - 136</b> | <b>1357.7761</b> | <b>1356.7688</b> | <b>1356.7473</b> | <b>16</b> | <b>1 R.LRLDQLTANSAR.L</b>                   |

|           |           |           |           |    |   |                                  |
|-----------|-----------|-----------|-----------|----|---|----------------------------------|
| 142 - 152 | 1215.6886 | 1214.6813 | 1214.6255 | 46 | 0 | R.DNLAQDLATVR.Q                  |
| 155 - 162 | 988.5643  | 987.5570  | 987.4985  | 59 | 0 | K.LQDETNR.L                      |
| 155 - 173 | 2233.1287 | 2232.1214 | 2232.1134 | 4  | 1 | K.LQDETNRLEAENNLAAYR.Q           |
| 163 - 173 | 1263.6997 | 1262.6924 | 1262.6255 | 53 | 0 | R.LEAENNLAAYR.Q                  |
| 189 - 198 | 1245.7267 | 1244.7194 | 1244.6612 | 47 | 1 | R.KIESLEEEIR.F                   |
| 202 - 209 | 1039.5876 | 1038.5803 | 1038.5458 | 33 | 1 | R.KIHEEEVR.E                     |
| 203 - 209 | 911.4642  | 910.4569  | 910.4508  | 7  | 0 | K.IHEEEVR.E                      |
| 210 - 217 | 986.5663  | 985.5590  | 985.5192  | 40 | 0 | R.ELQEQLAR.Q                     |
| 261 - 270 | 1050.5624 | 1049.5551 | 1049.5142 | 39 | 0 | K.FADLTDAAAR.N                   |
| 320 - 330 | 1208.6561 | 1207.6488 | 1207.5833 | 54 | 0 | R.EAASYQEALAR.L                  |
| 331 - 344 | 1650.7798 | 1649.7725 | 1649.7566 | 10 | 1 | R.LEEEGQSLKDEMAR.H Oxidation (M) |
| 345 - 356 | 1499.8199 | 1498.8126 | 1498.7780 | 23 | 0 | R.HLQEYQDLLNVK.L                 |
| 357 - 367 | 1277.8020 | 1276.7947 | 1276.7027 | 72 | 0 | K.LALDIEIATYR.K                  |
| 368 - 376 | 1087.5906 | 1086.5833 | 1086.5669 | 15 | 1 | R.KLLEGEENR.I                    |
| 369 - 376 | 959.4702  | 958.4629  | 958.4719  | -9 | 0 | K.LLEGEENR.I                     |

### Probability Based Mowse Score

Protein score is  $-10 \cdot \log(P)$ , where P is the probability that the observed match is a random event. Protein scores greater than 64 are significant ( $p < 0.05$ ).

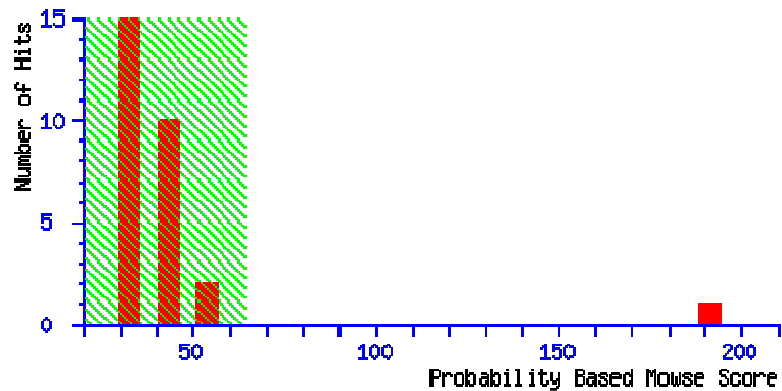

Match to: **Q5VU58\_HUMAN** Score: **106** Expect: **3.7e-06**  
**Tropomyosin 3.- Homo sapiens (Human).**

Fixed modifications: Carbamidomethyl (C)  
Variable modifications: Oxidation (M)  
Cleavage by Trypsin: cuts C-term side of KR unless next residue is P  
Number of mass values searched: **29**  
Number of mass values matched: **11**  
Sequence Coverage: **34%**

Mached peptides shown in **Bold Red** in the primary sequence obtained from the NCBI database

**1** MAGITTIEAV **KRKIQVLQQQ ADDAEERAER** LQREVEGER AREQAEAEVA  
**51** SLNRR**IQLVE EELDRA**QERL ATALQKLEEA EK**AADESERG** MKVIENRALK  
**101** DEEKMELQEI QLKEAKHIAE EADRK**YEEVA RKLVIIEGDL ERTEERAELA**  
**151** ESRCREMDEQ IRLMDQNLKC LSAAEEKYSQ **KEDKYEEEIK** ILTDKLKEAE  
**201** TR**AEFAERSV AKLEKTIDDL EDELYAQ**KLK YKAISEELDH ALNDMTSI

MS peak list

709.3303, **718.3264**, **722.3490**, 741.3730, **777.3282**, 861.0493, 864.4766, **894.4835**, 1050.0704, 1072.0092, 1126.5867, **1156.6956**  
**1182.6025**, **1243.7062**, **1284.8145**, 1314.8544, 1316.7472, 1375.7930, 1442.7357, 1463.8319, **1642.9063**, 1664.8201, **1770.9100**  
1816.8038, **1922.9639**, 1962.9540, 2261.1328, 2564.1616, 2839.2000

| Start - End      | Observed         | Mr(expt)         | Mr(calc)         | ppm        | Miss Sequence                |
|------------------|------------------|------------------|------------------|------------|------------------------------|
| <b>13 - 27</b>   | <b>1770.9100</b> | <b>1769.9027</b> | <b>1769.8908</b> | <b>7</b>   | <b>1 R.KIQVLQQQADDAEER.A</b> |
| <b>14 - 27</b>   | <b>1642.9063</b> | <b>1641.8990</b> | <b>1641.7958</b> | <b>63</b>  | <b>0 K.IQVLQQQADDAEER.A</b>  |
| <b>34 - 39</b>   | <b>718.3264</b>  | <b>717.3191</b>  | <b>717.3293</b>  | <b>-14</b> | <b>0 R.EVEGER.R</b>          |
| <b>56 - 65</b>   | <b>1243.7062</b> | <b>1242.6989</b> | <b>1242.6456</b> | <b>43</b>  | <b>0 R.IQLVEEELDR.A</b>      |
| <b>83 - 89</b>   | <b>777.3282</b>  | <b>776.3209</b>  | <b>776.3300</b>  | <b>-12</b> | <b>0 K.AADESER.G</b>         |
| <b>126 - 132</b> | <b>894.4835</b>  | <b>893.4762</b>  | <b>893.4606</b>  | <b>17</b>  | <b>1 K.YEEVARK.L</b>         |
| <b>132 - 142</b> | <b>1284.8145</b> | <b>1283.8072</b> | <b>1283.7449</b> | <b>49</b>  | <b>1 R.KLVIIEGDLER.T</b>     |
| <b>133 - 142</b> | <b>1156.6956</b> | <b>1155.6883</b> | <b>1155.6499</b> | <b>33</b>  | <b>0 K.LVIIEGDLER.T</b>      |
| <b>182 - 190</b> | <b>1182.6025</b> | <b>1181.5952</b> | <b>1181.5452</b> | <b>42</b>  | <b>1 K.EDKYEEEIK.I</b>       |
| <b>203 - 208</b> | <b>722.3490</b>  | <b>721.3417</b>  | <b>721.3395</b>  | <b>3</b>   | <b>0 R.AEFAER.S</b>          |

213 - 228 1922.9639 1921.9566 1921.9520 2 1 K.LEKTIDDLEDELYAQK.L

### Probability Based Mowse Score

Protein score is  $-10 \cdot \log(P)$ , where P is the probability that the observed match is a random event. Protein scores greater than 64 are significant ( $p < 0.05$ ).

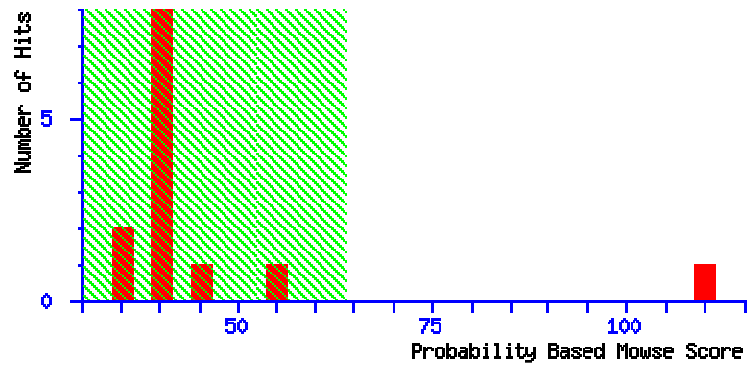

Match to: **A32936** Score: **158** Expect: **5.4e-11**  
**glial fibrillary acidic protein - human**

Fixed modifications: Carbamidomethyl (C)  
Variable modifications: Oxidation (M)  
Cleavage by Trypsin: cuts C-term side of KR unless next residue is P  
Number of mass values searched: **18**  
Number of mass values matched: **13**  
Sequence Coverage: **32%**

Mached peptides shown in **Bold Red** in the primary sequence obtained from the NCBI database

1 MERRRITSAA RRSYVSSGEM MVGGLAPGRR LGPGTRLSLA RMPPPLPTRV  
51 DFSLAGALNA GFKETRASER **AEMMELNDRF ASYIEK**VRFL EQQNK**ALAAE**  
101 **LNQLRAKEPT KLADVYQ AEL RELRLRLDQL TANSARLEVE RDNLAQDLAT**  
151 **VRQKLQDET**N LR**LEAEN**LA **AYRQEA**DEAT LARLDLER**KI ESLEEE**IRFL  
201 R**KIH**EEEVRE **LQEQLAR**QQV HVELDVAKPD LTAALKEIRT QYEAMASSNM  
251 HEAEWYRSK **FADLTDAAR** NAELLRQAKH EANDYRRQLQ SLTCDLESLR  
301 GTNESLERQM REQEERHVRE **AASYQEALAR LEEEGQSLKD EMARHLQEYQ**  
351 **DLN**VKLALD **IEIATYR**KLL EGEENRITIP VQTFSNLQIR ETSLDTKSVS  
401 EGHLKRNIVV KTVEMRDGEV IKESKQEHKD VM

#### MS peak list

741.3560, **986.5276**, **1039.5798**, **1050.5253**, **1098.6605**, **1177.6804**, 1199.6888, **1208.6344**, **1215.6323**, **1245.6857**, **1263.6831**  
**1277.7644**, **1499.8074**, **1586.7888**, **1650.7819**, 1805.0127, **1962.9745**, 2261.1853

| Start - End | Observed  | Mr(expt)  | Mr(calc)  | ppm | Miss Sequence                        |
|-------------|-----------|-----------|-----------|-----|--------------------------------------|
| 71 - 86     | 1962.9745 | 1961.9672 | 1961.8862 | 41  | 1 R.AEMMELNDRFASYIEK.V Oxidation (M) |
| 96 - 105    | 1098.6605 | 1097.6532 | 1097.6193 | 31  | 0 K.ALAAELNQLR.A                     |
| 112 - 121   | 1177.6804 | 1176.6731 | 1176.6139 | 50  | 0 K.LADVYQAELE.R                     |
| 142 - 152   | 1215.6323 | 1214.6250 | 1214.6255 | -0  | 0 R.DNLAQDLATVR.Q                    |
| 163 - 173   | 1263.6831 | 1262.6758 | 1262.6255 | 40  | 0 R.LEAENNLAAAYR.Q                   |
| 189 - 198   | 1245.6857 | 1244.6784 | 1244.6612 | 14  | 1 R.KIESLEEEIR.F                     |
| 202 - 209   | 1039.5798 | 1038.5725 | 1038.5458 | 26  | 1 R.KIHHEEEVR.E                      |
| 210 - 217   | 986.5276  | 985.5203  | 985.5192  | 1   | 0 R.ELQEQLAR.Q                       |
| 261 - 270   | 1050.5253 | 1049.5180 | 1049.5142 | 4   | 0 K.FADLTDAAR.N                      |
| 320 - 330   | 1208.6344 | 1207.6271 | 1207.5833 | 36  | 0 R.EAASYQEALAR.L                    |
| 331 - 344   | 1650.7819 | 1649.7746 | 1649.7566 | 11  | 1 R.LEEEGQSLKDEMAR.H Oxidation (M)   |
| 345 - 356   | 1499.8074 | 1498.8001 | 1498.7780 | 15  | 0 R.HLQEYQDLLNVK.L                   |
| 357 - 367   | 1277.7644 | 1276.7571 | 1276.7027 | 43  | 0 K.LALDIEIATYR.K                    |

### Probability Based Mowse Score

Protein score is  $-10 \cdot \log(P)$ , where P is the probability that the observed match is a random event. Protein scores greater than 64 are significant ( $p < 0.05$ ).

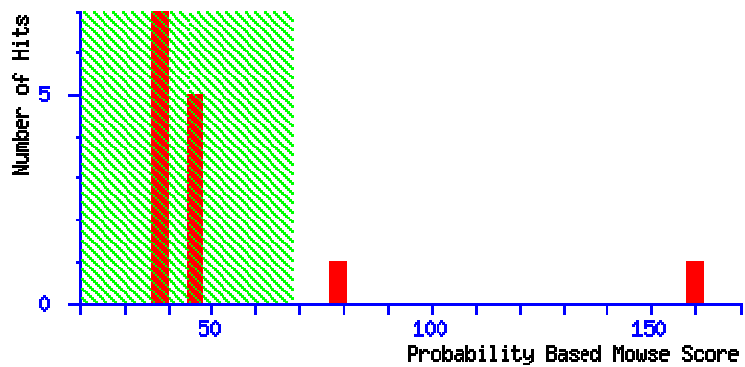

Match to: **I37082** Score: **83** Expect: **0.0017**  
**GDP-dissociation inhibitor XAP-4 – human**

Fixed modifications: Carbamidomethyl (C)  
Variable modifications: Oxidation (M)  
Cleavage by Trypsin: cuts C-term side of KR unless next residue is P  
Number of mass values searched: **26**  
Number of mass values matched: **9**  
Sequence Coverage: **25%**

Mached peptides shown in **Bold Red** in the primary sequence obtained from the NCBI database

1 MDEEYDVIVL GTGLTECILS GIMSVNGKKV LHMDRNPYYG GESSITPLE  
51 ELYKRFQLE GPPESMGRGR DWNVDLIPKF LMANGQLVKM LLYTEVTRYL  
101 DFK**VVEGSFV YKGGKIYKVP STETEALASN LMGMFEKRRF RKFLVFNANF**  
151 **DENDPKTFEG VDPQTSMRD** VYRKFDLGQD VIDFTGHALA LYR**TDDYLDQ**  
201 **PCLETVNRIG LYSESLARYG** KSPYLYPLYG LGELPQGFAR LSAIYGGTYM  
251 LNKPVDDIIM ENKVVGVKS EGEVARCK**QL ICDPSYIPDR** VRKAGQVIRI  
301 **ICILSHPIKN TNDANSCQH IPQNQVNRKS** DIYVCMISYA HNVAAQGKYI  
351 AIASTTVETT DPEKEVEPAL ELLEPIDQKF VAISDLYEPI DDGCESQVFC  
401 SCSYDATTHF ETTCNDIKDI YKR**MAGTAFD FENMKR**KQND VFGAEAEQ

MS peak list

861.0759, **938.5306**, 960.5065, **1027.5658**, 1137.6238, **1193.7241**, 1265.6257, 1287.6805, 1328.7467, 1420.6486  
**1476.7362**, **1484.7094**, 1498.7152, **1549.6688**, 1591.8040, **1654.8220**, 1676.8157, 1816.9070, **1838.8953**, 1935.9507  
1941.9634, 1962.9702, 2107.9888, **2198.9829**, 2261.1084, 3442.4966

| Start - End      | Observed         | Mr(expt)         | Mr(calc)         | ppm       | Miss Sequence                           |
|------------------|------------------|------------------|------------------|-----------|-----------------------------------------|
| <b>104 - 112</b> | <b>1027.5658</b> | <b>1026.5585</b> | <b>1026.5386</b> | <b>19</b> | <b>0 K.VVEGSFVYK.G</b>                  |
| <b>143 - 156</b> | <b>1654.8220</b> | <b>1653.8147</b> | <b>1653.8039</b> | <b>7</b>  | <b>0 K.FLVFNANFDENDPK.T</b>             |
| <b>157 - 169</b> | <b>1484.7094</b> | <b>1483.7021</b> | <b>1483.6613</b> | <b>27</b> | <b>0 K.TFEGVDPQTSMR.D</b> Oxidation (M) |
| <b>194 - 208</b> | <b>1838.8953</b> | <b>1837.8880</b> | <b>1837.8152</b> | <b>40</b> | <b>0 R.TDDYLDQPCLETVNR.I</b>            |
| <b>211 - 218</b> | <b>938.5306</b>  | <b>937.5233</b>  | <b>937.4869</b>  | <b>39</b> | <b>0 K.LYSESLAR.Y</b>                   |
| <b>279 - 290</b> | <b>1476.7362</b> | <b>1475.7289</b> | <b>1475.7079</b> | <b>14</b> | <b>0 K.QLICDPSYIPDR.V</b>               |

|           |           |           |           |     |   |                                   |
|-----------|-----------|-----------|-----------|-----|---|-----------------------------------|
| 300 - 309 | 1193.7241 | 1192.7168 | 1192.7002 | 14  | 0 | R.IICILSHPIK.N                    |
| 310 - 328 | 2198.9829 | 2197.9756 | 2198.0498 | -34 | 0 | K.NTNDANSCQHHPQNQVNR.K            |
| 424 - 436 | 1549.6688 | 1548.6615 | 1548.6701 | -6  | 1 | R.MAGTAFDFENMKR.K 2 Oxidation (M) |

### Probability Based Mowse Score

Protein score is  $-10 \cdot \log(P)$ , where P is the probability that the observed match is a random event. Protein scores greater than 64 are significant ( $p < 0.05$ ).

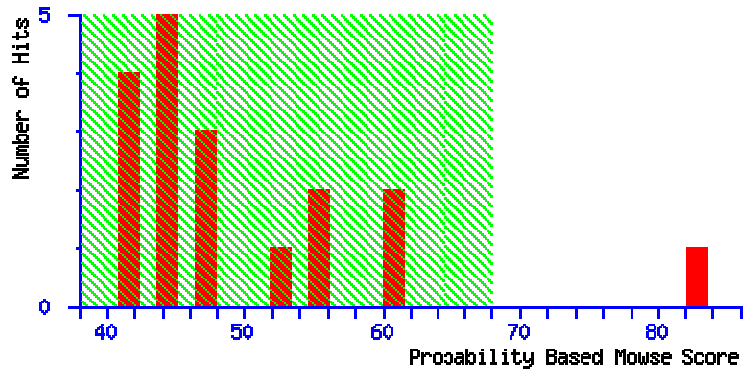



Match to: **I37082** Score: **136** Expect: **8.5e-09**  
**GDP-dissociation inhibitor XAP-4 - human**

Fixed modifications: Carbamidomethyl (C)  
Variable modifications: Oxidation (M)  
Cleavage by Trypsin: cuts C-term side of KR unless next residue is P  
Number of mass values searched: **35**  
Number of mass values matched: **14**  
Sequence Coverage: **34%**

Matched peptides shown in **Bold Red** in the primary sequence obtained from the NCBI database

**1** MDEEYDVIVL GTGLTECILS GIMSVNGKK**V LHMDRNPYYG GESSITPLE**  
**51** **ELYKRFQ**LE GPPESMGRGR DWNVDLIPKF LMANGQLVK**M LLYTEVTRYL**  
**101** **DFKVV**EGSFV **YKGGKIYKVP** STETELASN LMGMFEKRRF **RKFLV**FVANF  
**151** **DENDPKTFEG VDPQ**TSMRD VYRKFDLGQD VIDFTGHALA LYR**TDDYLDQ**  
**201** **PCLET**VNRIK **LYSESLARYG** KSPYLYPLYG LGELPQGFAR LSAIYGGTYM  
**251** LNKPVDDIIM ENKVVGVKS EGEVARCK**QL ICDPSYIPDR VRKAGQVIRI**  
**301** **ICILSHPIKN T**DANSC**QH IPQNQVNRKS** DIYVCMISYA HNVAAQGKYI  
**351** AIASTTVETT DPEKEVEPAL ELLEPIDQKF VAISDLYEPI DDGCESQVFC  
**401** SCSYDATTHF ETTCNDIKDI YKR**MAGTAFD FENMKR**KQND VFGEAEQ

MS peak list

741.3776, **771.4687**, **786.3939**, **861.0937**, **938.5117**, **1027.5422**, 1137.6259, **1141.6056**, **1193.7279**, 1195.6691, 1215.7300  
1314.8329, 1328.7288, 1385.7821, **1393.6305**, 1419.6003, 1442.7153, **1476.7178**, **1484.7157**, 1492.7255, 1498.6926  
**1549.6729**, **1654.8267**, 1676.8464, 1816.8745, **1838.8694**, 1962.9518, 1986.9896, 2108.0483, **2146.9690**, **2199.0796**  
2221.0967, 2261.1130, 2564.1614, 2839.1399

| Start - End    | Observed         | Mr(expt)         | Mr(calc)         | ppm        | Miss Sequence                               |
|----------------|------------------|------------------|------------------|------------|---------------------------------------------|
| <b>30 - 35</b> | <b>786.3939</b>  | <b>785.3866</b>  | <b>785.3854</b>  | <b>2</b>   | <b>0</b> <b>K.VLHMDR.N</b> Oxidation (M)    |
| <b>36 - 54</b> | <b>2146.9690</b> | <b>2145.9617</b> | <b>2146.0106</b> | <b>-23</b> | <b>0</b> <b>R.NPYYGESSITPLEELYK.R</b>       |
| <b>90 - 98</b> | <b>1141.6056</b> | <b>1140.5983</b> | <b>1140.5849</b> | <b>12</b>  | <b>0</b> <b>K.MLLYTEVTR.Y</b> Oxidation (M) |

|           |           |           |           |     |   |                        |                 |
|-----------|-----------|-----------|-----------|-----|---|------------------------|-----------------|
| 104 - 112 | 1027.5422 | 1026.5349 | 1026.5386 | -4  | 0 | K.VVEGSFVYK.G          |                 |
| 143 - 156 | 1654.8267 | 1653.8194 | 1653.8039 | 9   | 0 | K.FLVFVANFDENDPK.T     |                 |
| 157 - 169 | 1484.7157 | 1483.7084 | 1483.6613 | 32  | 0 | K.TFEGVDPQTTSMR.D      | Oxidation (M)   |
| 194 - 208 | 1838.8694 | 1837.8621 | 1837.8152 | 26  | 0 | R.TDDYLDQPCLETVNR.I    |                 |
| 211 - 218 | 938.5117  | 937.5044  | 937.4869  | 19  | 0 | K.LYSESLAR.Y           |                 |
| 279 - 290 | 1476.7178 | 1475.7105 | 1475.7079 | 2   | 0 | K.QLICDPSYIPDR.V       |                 |
| 293 - 299 | 771.4687  | 770.4614  | 770.4763  | -19 | 1 | R.KAGQVIR.I            |                 |
| 300 - 309 | 1193.7279 | 1192.7206 | 1192.7002 | 17  | 0 | R.IICILSHPIK.N         |                 |
| 310 - 328 | 2199.0796 | 2198.0723 | 2198.0498 | 10  | 0 | K.NTNDANSCQIIPQNQVNR.K |                 |
| 424 - 435 | 1393.6305 | 1392.6232 | 1392.5690 | 39  | 0 | R.MAGTAFDFENMKR.R      | 2 Oxidation (M) |
| 424 - 436 | 1549.6729 | 1548.6656 | 1548.6701 | -3  | 1 | R.MAGTAFDFENMKR.K      | 2 Oxidation (M) |

### Probability Based Mowse Score

Protein score is  $-10 \cdot \log(P)$ , where  $P$  is the probability that the observed match is a random event. Protein scores greater than 64 are significant ( $p < 0.05$ ).

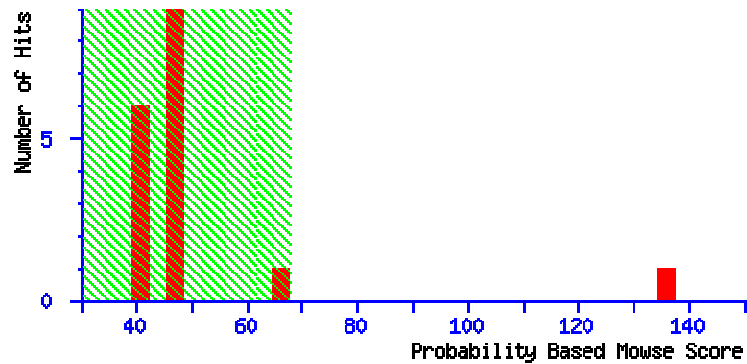

Match to: **DEHUE** Score: **142** Expect: **2.1e-09**  
**glutamate dehydrogenase [NAD(P)] (EC 1.4.1.3) precursor - human**

Fixed modifications: Carbamidomethyl (C)  
Variable modifications: Oxidation (M)  
Cleavage by Trypsin: cuts C-term side of KR unless next residue is P  
Number of mass values searched: **33**  
Number of mass values matched: **15**  
Sequence Coverage: **32%**

Mached peptides shown in **Bold Red** in the primary sequence obtained from the NCBI database

**1 MYRYLGEALL LSRAGPAALG SASADSAALL GWARGQAAA PQPGLALAAR**  
**51 RHYSEAVADR EDDPNFFK**MV EGGFDR**GASI VEDKLVEDLR TRESEEQKRN**  
**101 RVRGILRIK PCNHVLSLSF PIRR**DDGSWE VIEGYRAQHS QHRT**PCKGGI**  
**151 RYSTDVSVDE **VKALASLMTY KCAVVDV**PFG GAKAGVKINP KNYTDNELEK**  
**201 ITR**RFTMELA KKGFIGPID VPAPDMSTGE** REMSWIADTY ASTIGHYDIN**  
**251 AHACVTGKPI SQGGIHGRIS ATGRGVFHGI ENFINEASYM SILGMTPGFG**  
**301 DK**TFVVQGF NVGLHSMRYL** HRFGAKCIAV GESDGSIWNP DGIDPKELED**  
**351 FKL**QHGSILG FPKAKPYEGS** ILEADCILI PAASEKQLTK SNAPRVKAKI**  
**401 IAEGANGPTT PEADKIFLER NIMVIPDLYL NAGGVTVSYF EWLK**NLNHVS****  
**451 YGR**LTFKYER DSNYHLLMSV QESLERKFGK HGGTIPIVPT AEFQDR**ISGA**  
**501 SEK**DIVHSGL AYT**MERSARQ IMRTAMKYNL **GLDLR**TAAYV NAIEK**VFKVY****  
**551 NEAGVTFT**

MS peak list

**863.4280**, 885.4026, **963.5684**, 985.5447, **1011.5289**, **1016.4750**, 1021.5907, 1043.5859, **1059.5807**, 1081.5659, **1196.7139**,  
1218.7507, **1241.6593**, 1243.7296, 1282.8613, 1287.8097, 1419.8746, **1425.6869**, 1442.7965, 1452.7366, **1474.7150**, **1507.7788**,  
1529.7106, **1584.8340**, 1727.9176, **1737.9697**, 1759.9377, **1764.9347**, **1931.9518**, **1936.9331**, 1953.9659, 1963.0280, 2261.2473

| Start - End | Observed  | Mr(expt)  | Mr(calc)  | ppm | Miss Sequence                           |
|-------------|-----------|-----------|-----------|-----|-----------------------------------------|
| 1 - 13      | 1584.8340 | 1583.8267 | 1583.8493 | -14 | 1 -.MYRYLGEALLSR.A                      |
| 69 - 76     | 1016.4750 | 1015.4677 | 1015.4433 | 24  | 0 K.MVEGFFDR.G Oxidation (M)            |
| 125 - 136   | 1425.6869 | 1424.6796 | 1424.6208 | 41  | 0 R.DDGSWEVIEGYR.A                      |
| 137 - 143   | 863.4280  | 862.4207  | 862.4158  | 6   | 0 R.AQHSQHR.T                           |
| 152 - 162   | 1241.6593 | 1240.6520 | 1240.5823 | 56  | 0 R.YSTDVSVDEVK.A                       |
| 204 - 211   | 1011.5289 | 1010.5216 | 1010.5219 | -0  | 1 R.RFTMELAK.K Oxidation (M)            |
| 213 - 231   | 1931.9518 | 1930.9445 | 1930.9095 | 18  | 0 K.GFIGPGIDVPAPDMSTGER.E Oxidation (M) |
| 303 - 318   | 1764.9347 | 1763.9274 | 1763.8778 | 28  | 0 K.TFVVQGFGNVGLHSMR.Y Oxidation (M)    |
| 353 - 363   | 1196.7139 | 1195.7066 | 1195.6713 | 30  | 0 K.LQHGSILGFPK.A                       |
| 445 - 453   | 1059.5807 | 1058.5734 | 1058.5257 | 45  | 0 K.NLNHVSYGR.L                         |
| 461 - 476   | 1936.9331 | 1935.9258 | 1935.8996 | 14  | 0 R.DSNYHLLMSVQESLER.K Oxidation (M)    |
| 481 - 496   | 1737.9697 | 1736.9624 | 1736.8846 | 45  | 0 K.HGGTIPIVPTAEFQDR.I                  |
| 504 - 516   | 1507.7788 | 1506.7715 | 1506.7137 | 38  | 0 K.DIVHSGLAYTMER.S Oxidation (M)       |
| 528 - 535   | 963.5684  | 962.5611  | 962.5185  | 44  | 0 K.YNLGLDLR.T                          |
| 546 - 558   | 1474.7150 | 1473.7077 | 1473.7504 | -29 | 1 K.VFKVYNEAGVTFT.-                     |

### Probability Based Mowse Score

Protein score is  $-10 \cdot \log(P)$ , where P is the probability that the observed match is a random event. Protein scores greater than 64 are significant ( $p < 0.05$ ).

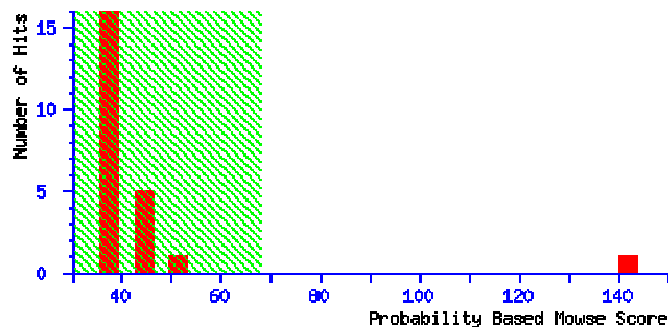

Match to: **HS90A\_HUMAN** Score: **128** Expect: **2.3e-08**  
**Heat shock protein HSP 90-alpha (HSP 86) (NY-REN-38 antigen).- Homo sapiens (Human).**

Fixed modifications: Carbamidomethyl (C)  
Variable modifications: Oxidation (M)  
Cleavage by Trypsin: cuts C-term side of KR unless next residue is P  
Number of mass values searched: **40**  
Number of mass values matched: **19**  
Sequence Coverage: **27%**

Mached peptides shown in **Bold Red** in the primary sequence obtained from the NCBI database

1 PEETQTQDQP MEEEEVETFA FQAEIAQLMS LIINTFYNSK EIFLRELISN  
51 SSDALDKIRY ESLTDPSKLD SGK**ELHINLI PNK**QDRTLTI VDTGIGMTKA  
101 DLINNLGTIA KSGTKAFMEA LQAGADISMI GQFGVGFYSA YLVAEKVTVI  
151 TKHNDDEQYA WESSAGGSFT VRT**DTGEPMG** RGTKVILHLK **EDQTEYLEER**  
201 RIKEIVKK**HS QFIGYPITLF VEKERD**KEVS DDEAEKEDK EEEKEKEEKE  
251 SEDKPEIEDV GSDEEEKGD GK**KKKKKIK EK****YIDQEELN KTKPIWTRNP**  
301 **DDITNEEYGE FYKSLTNDWE** DHLAVK**HFSV EGQLEFRALL FVPRRAPFDL**  
351 **FENR**KKKNNI KLYVRRVFIM DNCEELIPEY LNFIR**GVVDS EDLPLNISRE**  
401 MLQQSKILKV IRKNLVKK**CL ELFTELAEDK ENYK**K**FYEQF SKNIKLGHE**  
451 **DSQNR**KKLSE LLR**YYTSASG DEMVSLKDYC** TRMKENQKHI **YYITGETKDQ**  
501 **VANS**AFVERL RKHGLEVIYM IEPIDEYCVQ QLKEFEGKTL VSVTKEGLEL  
551 PEDEEEKKKQ EEK**TKFENL CKIMKDILEK** KVEKVVVSNR LVTSPCCIVT  
601 STYGWTANME RIMKAQALRD NSTMGYMAAK **KHLEINPDHS IETLRQKAE**  
651 ADKNDKSVKD LVILLYETAL LSSGFSLEDP QTHANRIYRM IKLGLGIDED  
701 DPTADDTSA A VTEEMPPLEG DDDTSRMEEV D

MS peak list

**815.4927**, 887.4418, **901.4628**, 913.5466, 917.4890, 933.4899, **948.4524**, **979.3931**, 992.5284, 998.5144, 1074.5299  
1078.5107, 1097.5565, **1108.5453**, 1126.5645, 1141.5605, **1151.5654**, **1168.5856**, **1190.6272**, 1194.6484, 1211.6158  
**1224.6273**, **1235.6168**, **1264.6488**, 1275.7311, **1311.5942**, **1348.6898**, **1513.8135**, 1559.7168, **1566.7184**, 1722.8606  
**1778.9429**, **1786.9763**, 1794.8567, **1833.8138**, 1922.9309, **2001.9091**, 2564.1680, 2825.2305, 2839.2808

| Start - End | Observed  | Mr(expt)  | Mr(calc)  | ppm | Miss Sequence                       |
|-------------|-----------|-----------|-----------|-----|-------------------------------------|
| 74 - 83     | 1190.6272 | 1189.6199 | 1189.6819 | -52 | 0 K.ELHINLIPNK.Q                    |
| 173 - 181   | 979.3931  | 978.3858  | 978.4077  | -22 | 0 R.TDTGEPMGR.G Oxidation (M)       |
| 191 - 200   | 1311.5942 | 1310.5869 | 1310.5626 | 19  | 0 K.EDQTEYLEER.R                    |
| 209 - 223   | 1778.9429 | 1777.9356 | 1777.9403 | -3  | 0 K.HSQFIGYPITLFVEK.E               |
| 283 - 291   | 1151.5654 | 1150.5581 | 1150.5506 | 7   | 0 K.YIDQEELNK.T                     |
| 292 - 298   | 901.4628  | 900.4555  | 900.5181  | -70 | 0 K.TKPIWTR.N                       |
| 299 - 313   | 1833.8138 | 1832.8065 | 1832.7741 | 18  | 0 R.NPDDITNEEYGEFYK.S               |
| 327 - 337   | 1348.6898 | 1347.6825 | 1347.6572 | 19  | 0 K.HFSVEGQLEFR.A                   |
| 338 - 344   | 815.4927  | 814.4854  | 814.5065  | -26 | 0 R.ALLFVPR.R                       |
| 345 - 354   | 1264.6488 | 1263.6415 | 1263.6360 | 4   | 1 R.RAPFDLFENR.K                    |
| 346 - 354   | 1108.5453 | 1107.5380 | 1107.5349 | 3   | 0 R.APFDLFENR.K                     |
| 386 - 399   | 1513.8135 | 1512.8062 | 1512.7784 | 18  | 0 R.GVVDSIDLPLNISR.E                |
| 419 - 434   | 2001.9091 | 2000.9018 | 2000.9401 | -19 | 1 K.CLELFTELAEDKENYK.K              |
| 436 - 442   | 948.4524  | 947.4451  | 947.4389  | 7   | 0 K.FYEQFSK.N                       |
| 446 - 455   | 1168.5856 | 1167.5783 | 1167.5632 | 13  | 0 K.LGIHEDSQNR.K                    |
| 464 - 477   | 1566.7184 | 1565.7111 | 1565.6919 | 12  | 0 R.YYTSASGDEMVSLLK.D Oxidation (M) |
| 489 - 498   | 1224.6273 | 1223.6200 | 1223.6186 | 1   | 0 K.HIYYITGETK.D                    |
| 499 - 509   | 1235.6168 | 1234.6095 | 1234.5942 | 12  | 0 K.DQVANSAFVER.L                   |
| 632 - 646   | 1786.9763 | 1785.9690 | 1785.9373 | 18  | 0 K.HLEINPDHSIETLR.Q                |

## Probability Based Mowse Score

Protein score is  $-10 \cdot \log(P)$ , where P is the probability that the observed match is a random event. Protein scores greater than 64 are significant ( $p < 0.05$ ).

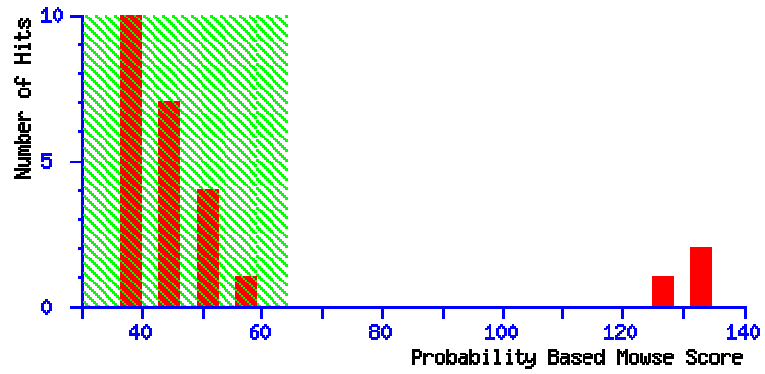

Match to: **DEHUE** Score: **147** Expect: **6.8e-10**  
**glutamate dehydrogenase [NAD(P)] (EC 1.4.1.3) precursor – human**

Fixed modifications: Carbamidomethyl (C)  
Variable modifications: Oxidation (M)  
Cleavage by Trypsin: cuts C-term side of KR unless next residue is P  
Number of mass values searched: **26**  
Number of mass values matched: **14**  
Sequence Coverage: **29%**

Mached peptides shown in **Bold Red** in the primary sequence obtained from the NCBI database

**1 MYRYLGEALL LSRAGPAALG SASADSAALL GWARGQPAAA PQPGLALAAR**  
**51 RHYSEAVADR EDDPNFFK****MV EGGFFDR**GASI VEDKLVEDLR TRESEEQKRN  
**101 RVRGILRIK PCNHVLSLSF PIRR****DDGSWE VIEGYRAQHS QHRT**PCKGGI  
**151 RYSTDVS****VDE VKALASL**MTY KCAVVDVDPFG GAKAGVKINP KNYTDNELEK  
**201 ITR****RFTMELA KKG**FIGPGID **VPAPDMSTGE** REMSWIADTY ASTIGHYDIN  
**251 AHACVTGKPI SQGGIHGRIS ATGRGVFHGI ENFINEASYM SILGMTPGFG**  
**301 DK****TFVVQGF** **NVGLHSMR**YL HRFGAKCIAV GESDGSIWNP DGIDPKELED  
**351 FK****LQHGSILG** **FPK**AKPYEGS ILEADCILI PAASEKQLTK SNAPRVKAKI  
**401 IAEGANGPTT PEADKIFLER NIMVIPDLYL NAGGVTVSYF EWLK****NLNHVS**  
**451 YGR**LTFKYER **DSNYHLLMSV QESLER**KFGK **HGGTIPIVPT AEFQDR**ISGA  
**501 SEK****DIVHSGL AYT**MERSARQ IMRTAMKYNL **GLDLR**TAAYV NAIEKVFKVY  
**551 NEAGVTFT**

MS peak list

**863.4333, 963.5420, 986.4902, 1011.5504, 1016.4686, 1021.5829, 1059.5675, 1196.6880, 1218.6903, 1241.6449, 1314.8014**  
**1420.7192, 1425.7238, 1452.7006, 1507.7491, 1584.8048, 1727.8667, 1737.9376, 1764.9100, 1885.0272, 1931.9064, 1936.8939**  
**1962.9546, 2058.9612, 2261.0847, 2839.1765**



| Start - End | Observed  | Mr(expt)  | Mr(calc)  | ppm | Miss Sequence                           |
|-------------|-----------|-----------|-----------|-----|-----------------------------------------|
| 1 - 13      | 1584.8048 | 1583.7975 | 1583.8493 | -33 | 1 -.MYRYLGEALLSR.A                      |
| 69 - 76     | 1016.4686 | 1015.4613 | 1015.4433 | 18  | 0 K.MVEGFFDR.G Oxidation (M)            |
| 125 - 136   | 1425.7238 | 1424.7165 | 1424.6208 | 67  | 0 R.DDGSWEVIEGYR.A                      |
| 137 - 143   | 863.4333  | 862.4260  | 862.4158  | 12  | 0 R.AQHSQHR.T                           |
| 152 - 162   | 1241.6449 | 1240.6376 | 1240.5823 | 45  | 0 R.YSTDVSVDEVK.A                       |
| 204 - 211   | 1011.5504 | 1010.5431 | 1010.5219 | 21  | 1 R.RFTMELAK.K Oxidation (M)            |
| 213 - 231   | 1931.9064 | 1930.8991 | 1930.9095 | -5  | 0 K.GFIGPGIDVPAPDMSTGER.E Oxidation (M) |
| 303 - 318   | 1764.9100 | 1763.9027 | 1763.8778 | 14  | 0 K.TFVVQGFQGNVGLHSMR.Y Oxidation (M)   |
| 353 - 363   | 1196.6880 | 1195.6807 | 1195.6713 | 8   | 0 K.LQHGSILGFPK.A                       |
| 445 - 453   | 1059.5675 | 1058.5602 | 1058.5257 | 33  | 0 K.NLNHVSYGR.L                         |
| 461 - 476   | 1936.8939 | 1935.8866 | 1935.8996 | -7  | 0 R.DSNYHLLMSVQESLER.K Oxidation (M)    |
| 481 - 496   | 1737.9376 | 1736.9303 | 1736.8846 | 26  | 0 K.HGGTIPIVPTAEFQDR.I                  |
| 504 - 516   | 1507.7491 | 1506.7418 | 1506.7137 | 19  | 0 K.DIVHSGLAYTMER.S Oxidation (M)       |
| 528 - 535   | 963.5420  | 962.5347  | 962.5185  | 17  | 0 K.YNLGLDLR.T                          |

### Probability Based Mowse Score

Protein score is  $-10 \cdot \log(P)$ , where P is the probability that the observed match is a random event. Protein scores greater than 64 are significant ( $p < 0.05$ ).

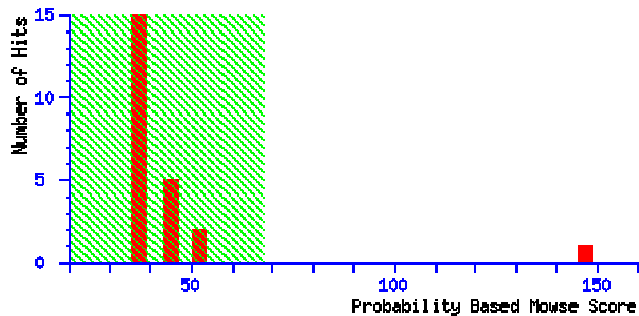

Match to: **I37082** Score: **66** Expect: **0.041**  
**GDP-dissociation inhibitor XAP-4 – human**

Fixed modifications: Carbamidomethyl (C)  
Variable modifications: Oxidation (M)  
Cleavage by Trypsin: cuts C-term side of KR unless next residue is P  
Number of mass values searched: **19**  
Number of mass values matched: **7**  
Sequence Coverage: **18%**

Mached peptides shown in **Bold Red** in the primary sequence obtained from the NCBI database

1 MDEEYDVIVL GTGLTECILS GIMSVNGKKV LHMDRNPYYG GESSITPLE  
51 ELYKRFQLE GPPESMGRGR DWNVDLIPKF LMANGQLVK**M LLYTEVTRYL**  
101 DFK**VVEGSFV YKGGKIYKVP** STETELASN LMGMFEKRRF RK**FLVVFVANF**  
151 **DENDPKTFEG VDPQTSMRD** VYRKFDLGQD VIDFTGHALA LYRTDDYLDQ  
201 PCLETVNR**IK LYSESLARYG KSPYLYPLYG LGELPQGFAR** LSAIYGGTYM  
251 LNKPVDDIIM ENKVVGVKS EGEVARCK**QL ICDPSYIPDR** VRKAGQVIRI  
301 ICILSHPIKN TNDANSCQII IPQNQVNRKS DIYVCMISYA HNVAAQGKYI  
351 AIASTTVETT DPEKEVEPAL ELLEPIDQKF VAISDLYEPI DDGCESQVFC  
401 SCSYDATTHF ETTCNDIKDI YKRMAGTAFD FENMKRKQND VFGAEAEQ

#### MS peak list

839.0895, 861.0973, 864.4933, **938.5453**, **1027.6019**, 1050.0892, 1137.6372, **1141.6316**, 1157.6376, 1324.7855, **1476.6768**, **1484.7656**  
1639.8713, **1654.7717**, 1794.7931, 1826.7345, 1848.8497, 2107.9934, **2141.0549**

| Start - End      | Observed         | Mr(expt)         | Mr(calc)         | ppm        | Miss     | Sequence                              |
|------------------|------------------|------------------|------------------|------------|----------|---------------------------------------|
| <b>90 - 98</b>   | <b>1141.6316</b> | <b>1140.6243</b> | <b>1140.5849</b> | <b>35</b>  | <b>0</b> | <b>K.MLLYTEVTR.Y</b> Oxidation (M)    |
| <b>104 - 112</b> | <b>1027.6019</b> | <b>1026.5946</b> | <b>1026.5386</b> | <b>55</b>  | <b>0</b> | <b>K.VVEGSFVYK.G</b>                  |
| <b>143 - 156</b> | <b>1654.7717</b> | <b>1653.7644</b> | <b>1653.8039</b> | <b>-24</b> | <b>0</b> | <b>K.FLVVFVANFDENDPK.T</b>            |
| <b>157 - 169</b> | <b>1484.7656</b> | <b>1483.7583</b> | <b>1483.6613</b> | <b>65</b>  | <b>0</b> | <b>K.TFEGVDPQTSMR.D</b> Oxidation (M) |
| <b>211 - 218</b> | <b>938.5453</b>  | <b>937.5380</b>  | <b>937.4869</b>  | <b>55</b>  | <b>0</b> | <b>K.LYSESLARY</b>                    |
| <b>222 - 240</b> | <b>2141.0549</b> | <b>2140.0476</b> | <b>2140.0993</b> | <b>-24</b> | <b>0</b> | <b>K.SPYLYPLYGLGELPQGFAR.L</b>        |

279 - 290 1476.6768 1475.6695 1475.7079 -26 0 K.QLICDPSYIPDR.V

### Probability Based Mowse Score

Protein score is  $-10 \cdot \log(P)$ , where P is the probability that the observed match is a random event. Protein scores greater than 64 are significant ( $p < 0.05$ ).

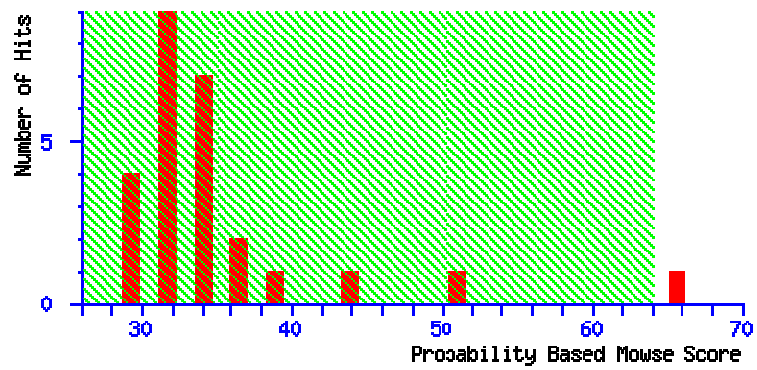

Match to: ENOA\_HUMAN Score: 69 Expect: 0.018

**Alpha-enolase (EC 4.2.1.11) (2-phospho-D-glycerate hydro-lyase) (Non- neural enolase) (NNE) (Enolase 1) (Phosphopyruvate hydratase) (C-myc promoter-binding protein) (MBP-1) (MPB-1) (Plasminogen-binding protein).- Homo sapiens (Human).**

Fixed modifications: Carbamidomethyl (C)

Variable modifications: Oxidation (M)

Cleavage by Trypsin: cuts C-term side of KR unless next residue is P

Number of mass values searched: 14

Number of mass values matched: 6

Sequence Coverage: 21%

Mached peptides shown in **Bold Red** in the primary sequence obtained from the NCBI database

1 SILKIHAREI FDSR**GNPTVE VDLFTSK**GLF RAAVPSGAST **GIYEALELRD**  
51 NDKTRYMGKG VSKAVEHINK TIAPALVSKK LNVTEQEKID KLMIEMDGTE  
101 NKSKFGANAI LGVSLAVCKA GAVEKGVPLY RHIADLAGNS EVILPVPFAN  
151 VINGGSHAGN **KLAMQEFMIL PVGAANFREA** MRIGAEVYHN LKNVIKEKYG  
201 KDATNVGDEG GFAPNILENK EGGLELLKTAI GKAGYTDK**VV IGMDVAASEF**  
251 **FRSGKYDLDF** KSPDDPSR**YI SPDQLADLYK** SFIKDYPPVVS IEDPFDQDDW  
301 GAWQ**FTASA GIQVVGDDLT VTNPK**RIAKA VNEKSCNCLL LKVNQIGSVT  
351 ESLQACKLAQ ANGWGVMVSH RSGETEDTFI ADLVVGLCTG QIKTGAPCRS  
401 ERLAKYNQLL RIEEELGSKA KFAGRNFRRNP LAK

MS peak list

1015.4597, 1140.6727, 1259.5148, **1406.6597**, **1425.7042**, 1480.7976, **1556.7074**, 1639.9264, 1757.0598, **1804.9202**, 1826.8208, **1939.9009**  
**2033.0331**, 2314.1104

| Start - End | Observed         | Mr(expt)         | Mr(calc)         | ppm        | Miss Sequence                                  |
|-------------|------------------|------------------|------------------|------------|------------------------------------------------|
| 15 - 27     | <b>1406.6597</b> | <b>1405.6524</b> | <b>1405.7089</b> | <b>-40</b> | <b>0 R.GNPTVEVDLFTSK.G</b>                     |
| 32 - 49     | <b>1804.9202</b> | <b>1803.9129</b> | <b>1803.9366</b> | <b>-13</b> | <b>0 R.AAVPSGASTGIYEALELR.D</b>                |
| 162 - 178   | <b>1939.9009</b> | <b>1938.8936</b> | <b>1938.9696</b> | <b>-39</b> | <b>0 K.LAMQEFMILPVGAANFR.E</b> 2 Oxidation (M) |
| 239 - 252   | <b>1556.7074</b> | <b>1555.7001</b> | <b>1555.7705</b> | <b>-45</b> | <b>0 K.VVIGMDVAASEFFR.S</b> Oxidation (M)      |
| 269 - 280   | <b>1425.7042</b> | <b>1424.6969</b> | <b>1424.7187</b> | <b>-15</b> | <b>0 R.YISPDQLADLYK.S</b>                      |

306 - 325 2033.0331 2032.0258 2032.0477 -11 0 K.FTASAGIQVVGDDLTVTNPK.R

### Probability Based Mowse Score

Protein score is  $-10 \cdot \log(P)$ , where P is the probability that the observed match is a random event.  
Protein scores greater than 64 are significant ( $p < 0.05$ ).

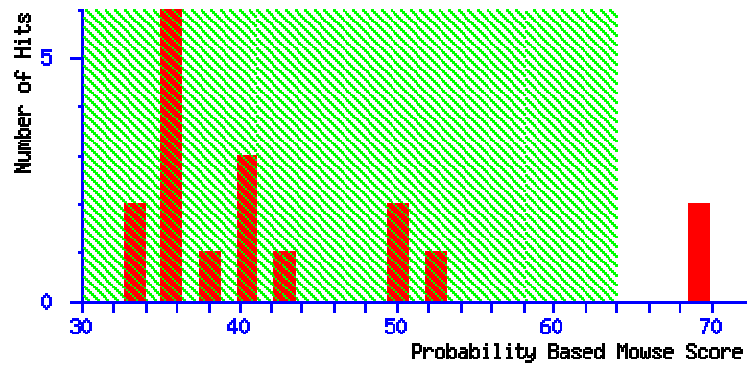

Match to: ENOG\_HUMAN Score: 175 Expect: 4.7e-13

**Gamma-enolase (EC 4.2.1.11) (2-phospho-D-glycerate hydro-lyase) (Neural enolase) (Neuron-specific enolase) (NSE) (Enolase 2).- Homo sapiens (Human).**

Fixed modifications: Carbamidomethyl (C)

Variable modifications: Oxidation (M)

Cleavage by Trypsin: cuts C-term side of KR unless next residue is P

Number of mass values searched: 47

Number of mass values matched: 19

Sequence Coverage: 57%

Mached peptides shown in **Bold Red** in the primary sequence obtained from the NCBI database

1 SIEKIWAREI LDSR **GNPTVE VDLYTAKGLF** RAAVPSGAST GIYEALRLD  
51 GDKQRYLGKG VLKAVDHINS TIAPALISSG LSVVEQEKLD NLMLELDGTE  
101 **NKSKFGANAI LGVSLAVCKA** GAAERELPLY RHIAQLAGNS DLILPVPAFN  
151 VINGGSHAGN **KLAMQEFMIL PVGAESFRDA** MRLGAEVYHT LKGVIKDKYG  
201 **KDATNVGDEG GFAPNILENS EALELVKEAI** DKAGYTEKIV IGMDVAASEF  
251 **YRDGKYDLDF KSPTDPSRYI TGDQLGALYQ** DFVRDYPVVS IEDPFDQDDW  
301 AAWSK**FTANV GIQIVGDDLT VTNPKRIERA** VEEKACNCLL LK**VNQIGSVT**  
351 **EAIQACKLAQ** ENGWGVMVSH **RSGETEDTFI ADLVVGLCTG QIKTGAPCRS**  
401 **ERLAKYNQLM RIEEELGDEA** RFAGHNFRNP SVL

MS peak list

732.4685, 759.4460, 781.4282, 790.5552, **800.4542**, **840.4814**, 848.5466, 905.5366, **1130.7090**, **1152.6849**, **1160.6422**, 1182.6262  
1187.7379, 1199.7175, 1235.7294, 1251.7222, 1357.8547, 1379.8485, 1385.6675, **1406.8060**, 1428.8086, **1519.9369**, 1529.5645  
1538.8795, 1556.8469, **1570.8927**, **1586.8916**, 1600.8772, **1617.9135**, **1620.8929**, 1642.8730, 1669.0327, **1805.0837**, 1827.0884  
**1859.0784**, 1913.4272, **1955.0912**, **1971.1100**, 1987.1138, **2102.2717**, 2124.3093, 2262.2771, **2353.2725**, **2578.5210**, 2600.5281  
**2702.3838**, 3025.7192

| Start - End | Observed         | Mr(expt)         | Mr(calc)         | ppm       | Miss Sequence                   |
|-------------|------------------|------------------|------------------|-----------|---------------------------------|
| 15 - 27     | <b>1406.8060</b> | <b>1405.7987</b> | <b>1405.7089</b> | <b>64</b> | <b>0 R.GNPTVEVDLYTAK.G</b>      |
| 32 - 49     | <b>1805.0837</b> | <b>1804.0764</b> | <b>1803.9366</b> | <b>77</b> | <b>0 R.AAVPSGASTGIYEALRLR.D</b> |

|           |           |           |           |    |   |                                      |
|-----------|-----------|-----------|-----------|----|---|--------------------------------------|
| 64 - 88   | 2578.5210 | 2577.5137 | 2577.3650 | 58 | 0 | K.AVDHINSTIAPALISSGLSVVEQEK.L        |
| 89 - 102  | 1620.8929 | 1619.8856 | 1619.7712 | 71 | 0 | K.LDNLMLELDGTENK.S Oxidation (M)     |
| 105 - 119 | 1519.9369 | 1518.9296 | 1518.8228 | 70 | 0 | K.FGANAILGVSLAVCK.A                  |
| 162 - 178 | 1955.0912 | 1954.0839 | 1953.9692 | 59 | 0 | K.LAMQEFMILPVGAEFR.D Oxidation (M)   |
| 162 - 178 | 1971.1100 | 1970.1027 | 1969.9641 | 70 | 0 | K.LAMQEFMILPVGAEFR.D 2 Oxidation (M) |
| 183 - 192 | 1130.7090 | 1129.7017 | 1129.6131 | 78 | 0 | R.LGAEVYHTLK.G                       |
| 202 - 227 | 2702.3838 | 2701.3765 | 2701.3082 | 25 | 0 | K.DATNVGDEGGFAPNILENSEALELVK.E       |
| 239 - 252 | 1570.8927 | 1569.8854 | 1569.7861 | 63 | 0 | K.IVIGMDVAASEFYR.D                   |
| 239 - 252 | 1586.8916 | 1585.8843 | 1585.7810 | 65 | 0 | K.IVIGMDVAASEFYR.D Oxidation (M)     |
| 256 - 261 | 800.4542  | 799.4469  | 799.3752  | 90 | 0 | K.YDLDFK.S                           |
| 269 - 284 | 1859.0784 | 1858.0711 | 1857.9261 | 78 | 0 | R.YITGDQLGALYQDFVR.D                 |
| 306 - 325 | 2102.2717 | 2101.2644 | 2101.1056 | 76 | 0 | K.FTANVGIQIVGDDLTVTNPK.R             |
| 343 - 357 | 1617.9135 | 1616.9062 | 1616.8192 | 54 | 0 | K.VNQIGSVTEAIQACK.L                  |
| 372 - 393 | 2353.2725 | 2352.2652 | 2352.1519 | 48 | 0 | R.SGETEDTFIADLVVGLCTGQIK.T           |
| 403 - 411 | 1152.6849 | 1151.6776 | 1151.6121 | 57 | 1 | R.LAKYNQLMR.I Oxidation (M)          |
| 406 - 411 | 840.4814  | 839.4741  | 839.3959  | 93 | 0 | K.YNQLMR.I Oxidation (M)             |
| 412 - 421 | 1160.6422 | 1159.6349 | 1159.5357 | 86 | 0 | R.IEEELGDEAR.F                       |

### Probability Based Mowse Score

Protein score is  $-10 \cdot \log(P)$ , where P is the probability that the observed match is a random event. Protein scores greater than 64 are significant ( $p < 0.05$ ).

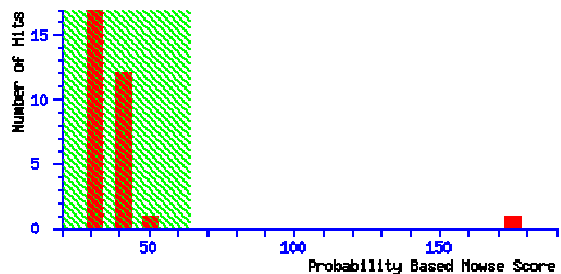

Match to: **S44430** Score: **85** Expect: **0.00051**  
**synuclein – human**

Fixed modifications: Carbamidomethyl (C)  
Variable modifications: Oxidation (M)  
Cleavage by Trypsin: cuts C-term side of KR unless next residue is P  
Number of mass values searched: **39**  
Number of mass values matched: **7**  
Sequence Coverage: **51%**

Mached peptides shown in **Bold Red** in the primary sequence obtained from the NCBI database

**1** MDVFMKGLSM AK**EGVVAAAE KTKQGVTEAA EKTKEGVLYV GSKTREGVVQ**  
**51** **GVASVAEKTK EQASHLGGAV FSGAGNIAAA TGLVKREEFP** TDLKPEEVAQ  
**101** EAAEEPLIEP LMEPEGESYE DPPQEYQEY EPEA

823.2022, 861.1762, **873.4603**, 915.4456, **932.4368**, **951.5034**, 973.4697, 1140.4783, **1180.6193**, 1202.5708, **1272.6425**, 1294.6385  
1316.5720, 1330.6475, 1351.5885, 1433.6743, 1471.8036, 1479.7554, 1501.6285, 1546.7606, 1576.7793, 1627.8562, 1639.9393  
1649.8220, 1730.7390, 1740.8965, 1773.9768, 1880.7982, 1987.9834, 2304.0776, 2315.9878, **2326.1360**, 2338.1221, 2348.1143  
2358.0645, 2380.0623, 2533.1401, **2555.2349**, 3754.4050

| Start - End    | Observed         | Mr(expt)         | Mr(calc)         | ppm        | Miss     | Sequence                               |
|----------------|------------------|------------------|------------------|------------|----------|----------------------------------------|
| <b>13 - 21</b> | <b>873.4603</b>  | <b>872.4530</b>  | <b>872.4603</b>  | <b>-8</b>  | <b>0</b> | <b>K.EGVVAAAEK.T</b>                   |
| <b>24 - 32</b> | <b>932.4368</b>  | <b>931.4295</b>  | <b>931.4611</b>  | <b>-34</b> | <b>0</b> | <b>K.QGVTEAAEK.T</b>                   |
| <b>33 - 43</b> | <b>1180.6193</b> | <b>1179.6120</b> | <b>1179.6499</b> | <b>-32</b> | <b>1</b> | <b>K.TKEGVLYVGSK.T</b>                 |
| <b>35 - 43</b> | <b>951.5034</b>  | <b>950.4961</b>  | <b>950.5073</b>  | <b>-12</b> | <b>0</b> | <b>K.EGVLYVGSK.T</b>                   |
| <b>46 - 58</b> | <b>1272.6425</b> | <b>1271.6352</b> | <b>1271.6721</b> | <b>-29</b> | <b>0</b> | <b>R.REGVVQGVASVAEK.T</b>              |
| <b>59 - 85</b> | <b>2555.2349</b> | <b>2554.2276</b> | <b>2554.3503</b> | <b>-48</b> | <b>1</b> | <b>K.TKEQASHLGGAVFSGAGNIAAATGLVK.R</b> |
| <b>61 - 85</b> | <b>2326.1360</b> | <b>2325.1287</b> | <b>2325.2077</b> | <b>-34</b> | <b>0</b> | <b>K.EQASHLGGAVFSGAGNIAAATGLVK.R</b>   |



## Probability Based Mowse Score

Protein score is  $-10 \cdot \log(P)$ , where  $P$  is the probability that the observed match is a random event. Protein scores greater than 64 are significant ( $p < 0.05$ ).

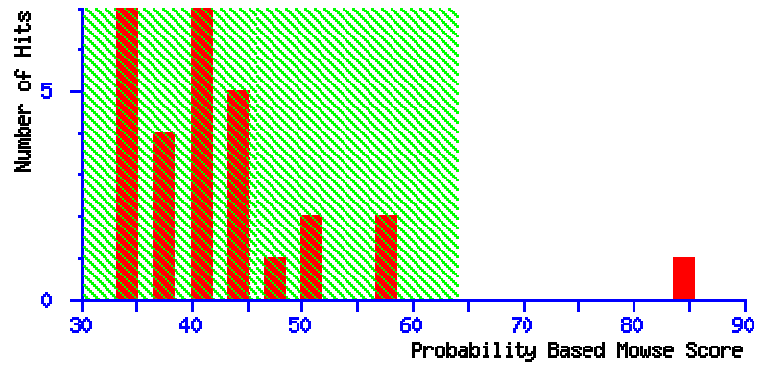

Supplement: NIHMS86634-supplement-1_si_001.pdf [file NIHMS86634-supplement-1_si_001.pdf]
